# Supplementary material
Source: publisher figshare collection journal article supplement (https://acs.figshare.com/ndownloader/files/15203972)
Supplement: Supplementary file 1 [file 15203972]

*Supporting Information*

**Nanoparticle Formation Kinetics and Mechanistic Studies Important to  
Mechanism-Based Particle Size Control: Evidence for Ligand-Based Slowing of  
the Autocatalytic Surface Growth Step Plus Postulated Mechanisms**

Saim Özkar,<sup>a</sup> Richard G. Finke\*<sup>b</sup>

<sup>a</sup> Department of Chemistry, Middle East Technical University, 06800 Ankara, Turkey

<sup>b</sup> Department of Chemistry, Colorado State University, Fort Collins, CO 80523 USA

**S1. Derivation of Kinetics for the  $k_{2\text{obs}}$  vs initial  $[A]_0 = [(\text{COD})\text{Ir}^{\text{I}}\cdot\text{POM}^{8-}]_0$  and  $[\text{POM}^{9-}]_{\text{added}}$  concentration Data and Plots from the Bimolecular Nucleation Mechanism**

For the bimolecular nucleation mechanism, the differential and integrated forms of the rate law are S1, S2 and S3, all following prior derivations.<sup>1, 2</sup>

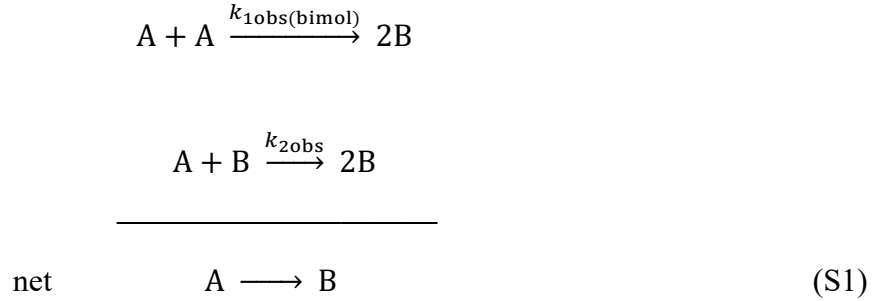

$$-\frac{d[A]}{dt} = \frac{d[B]}{dt} = 2 k_{1\text{obs(bimol)}} [A]_t^2 + k_{2\text{obs}} [A]_t [B]_t \tag{S2}$$

$$[A]_t = \frac{k_{2\text{obs}}[A]_0}{2 k_{1\text{obs(bimol)}} \{e^{(k_{2\text{obs}}[A]_0 t)} - 1\} + k_{2\text{obs}}} \tag{S3}$$

The proposed more intimate mechanism for the growth step is shown below, (S4) to (S6), along with the associated differential eq S7:

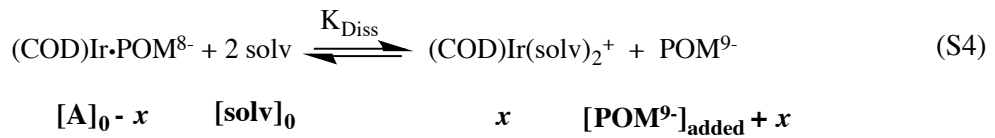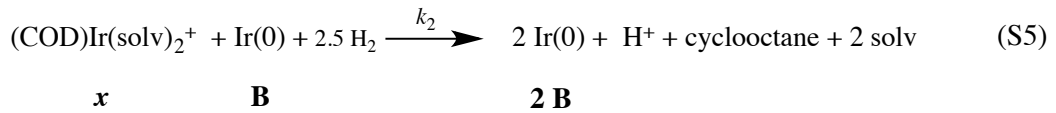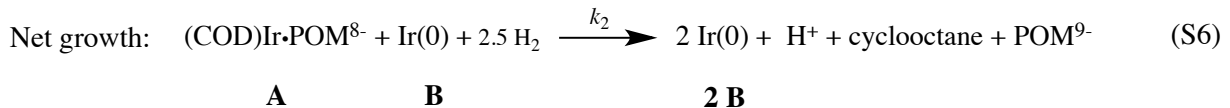

For rate-determining autocatalytic growth  $k_2$ , S5, the associated differential equation is S7:

$$\frac{d[B]}{dt} = k_2[(\text{COD})\text{Ir}(\text{solv})_2^+][B]_t = k_2[x][B]_t \quad (\text{S7})$$

What we need next is an expression for  $x$ ; hence, we can write  $K_{\text{Diss}}$  and  $K_{\text{Diss}(\text{apparent})} = K_{\text{Diss}}[\text{solv}]^2$ :

$$K_{\text{Diss}} = \frac{[(\text{COD})\text{Ir}(\text{solv})_2^+][\text{POM}^{9-}]}{[(\text{COD})\text{IrPOM}^{8-}][\text{solv}]^2} = \frac{[x](\text{POM}^{9-})_{\text{added}} + x}{([A]_0 - x)[\text{solv}]^2} \quad (\text{S8})$$

$$K_{\text{Diss}(\text{appt})} = K_{\text{Diss}}[\text{solv}]^2 = \frac{[x](\text{POM}^{9-})_{\text{added}} + x}{([A]_0 - x)} \quad (\text{S9})$$

From eq S9, we can write eq S10 and then from the solution of the quadratic equation, and for the positive root, eq S11

$$x^2 + (K_{\text{Diss}(\text{appt})} + [\text{POM}^{9-}]_{\text{added}})x - K_{\text{Diss}(\text{appt})}[A]_0 = 0 \quad (\text{S10})$$

$$x = \frac{1}{2} \left( -(K_{\text{Diss}(\text{appt})} + [\text{POM}^{9-}]_{\text{added}}) + ((K_{\text{Diss}(\text{appt})} + [\text{POM}^{9-}]_{\text{added}})^2 + 4K_{\text{Diss}(\text{appt})}[A]_0)^{1/2} \right) \quad (\text{S11})$$

Now comparing and equating eqs S2 and S7 yields eq 12 for the growth step:

$$\frac{d[B]}{dt} = k_{2\text{obs}}[A]_t[B]_t = k_2[x][B]_t \quad (\text{S12})$$

For the early part of the growth section of the typically sigmoidal curve, and when fitting just first  $\leq 1/2$  of the sigmoidal curve as we do (so that the cyclohexene hydrogenation catalytic reporter reaction (CHHR) approximations are better satisfied<sup>3</sup>), we can take  $[A]_t \approx [A]_0$ ; that is, eq S13a and S13b

$$k_{2\text{obs}}[A]_0[B]_t = k_2[x][B]_t \quad (\text{S13a})$$

$$k_{2\text{obs}} = \frac{k_2[x]}{[A]_0} \quad (\text{S13b})$$

Substituting eq S11 to S13b yields the desired eq S14:

$$k_{2\text{obs}} = \frac{k_2}{2[A]_0} \left( -(\text{K}_{\text{Diss(appt)}} + [\text{POM}^{9-}]_{\text{added}}) + ((\text{K}_{\text{Diss(appt)}} + [\text{POM}^{9-}]_{\text{added}})^2 + 4\text{K}_{\text{Diss(appt)}}[A]_0)^{1/2} \right) \quad (\text{S14})$$

Eq S14 was then used to fit the experimental  $k_{2\text{obs}}$  vs  $[\text{POM}^{9-}]_{\text{added}}$  or the initial  $[A]_0 = [(1,5\text{-COD})\text{Ir}^{\text{I}}\cdot\text{POM}^{8-}]_0$  concentration data.

## S2. Derivation of Kinetics for the OFWK 4-Step Mechanism (4-Step Ligand Binding Mechanism)

The proposed mechanism (and K + k definitions) are

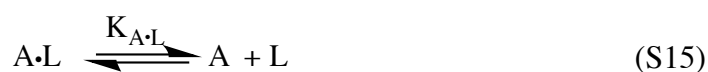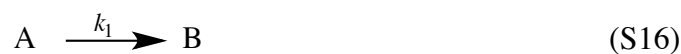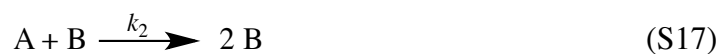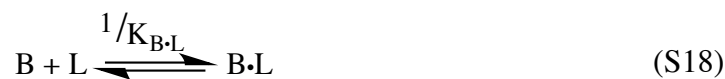

The  $\text{K}_{\text{A}\cdot\text{L}}$  and  $\text{K}_{\text{B}\cdot\text{L}}$  equilibrium constants are defined in eq (S19) and eq (S20), respectively:

$$\text{K}_{\text{A}\cdot\text{L}} = \frac{[\text{A}][\text{L}]}{[\text{A}\cdot\text{L}]} \quad (\text{S19})$$

$$K_{B \cdot L} = \frac{[B \cdot L]}{[B][L]} \quad ; \quad \frac{1}{K_{B \cdot L}} = \frac{[B][L]}{[B \cdot L]} \quad (S20)$$

The mass balance equations are:

$$[A]_{\text{tot}} = [A]_t + [A \cdot L]_t \quad (S21a)$$

$$[L]_{\text{tot}} = [L]_t + [A \cdot L]_t + [B \cdot L]_t \quad (S21b)$$

For  $[L]_{\text{tot}} \gg [A]_{\text{tot}}$ , this equation simplifies to

$$[L]_{\text{tot}} \approx [L]_t \quad (S21c)$$

$$[B]_{\text{tot}} \approx [B]_t + [B \cdot L]_t \quad (S21d)$$

where it is understood that there is no B at  $t = 0$ , but then B grows as the reaction proceeds. From eq (S19) and eqs (S21a) + (S21c):

$$[A]_t = \frac{K_{A \cdot L}[A \cdot L]_t}{[L]_t} = \frac{K_{A \cdot L}([A]_{\text{tot}} - [A]_t)}{[L]_{\text{tot}}} = \frac{K_{A \cdot L}[A]_{\text{tot}} - K_{A \cdot L}[A]_t}{[L]_{\text{tot}}} \quad (S22a)$$

$$\text{or} \quad [A]_t [L]_{\text{tot}} + K_{A \cdot L} [A]_t = K_{A \cdot L} [A]_{\text{tot}} \quad (S22b)$$

$$\text{or} \quad [A]_t (K_{A \cdot L} + [L]_{\text{tot}}) = K_{A \cdot L} [A]_{\text{tot}} \quad (S22c)$$

hence,

$$[A]_t = \frac{K_{A \cdot L}[A]_{\text{tot}}}{K_{A \cdot L} + [L]_{\text{tot}}} \quad (22d)$$

Similarly, from eqs (S20), (S21c) and (S21d) we see that

$$[B]_t = \frac{[B \cdot L]_t}{K_{B \cdot L} [L]_{\text{tot}}} \quad (S23a)$$

$$\text{or} \quad [B]_t = \frac{([B]_{\text{tot}} - [B]_t)}{K_{B \cdot L} [L]_{\text{tot}}} \quad (S23b)$$

$$\text{or} \quad [B]_t [L]_{\text{tot}} K_{B \cdot L} + [B]_t = [B]_{\text{tot}} \quad (\text{S23c})$$

$$\text{or} \quad [B]_t (K_{B \cdot L} [L]_{\text{tot}} + 1) = [B]_{\text{tot}} \quad (\text{S23d})$$

$$\text{or} \quad [B]_t = \frac{[B]_{\text{tot}}}{K_{B \cdot L} [L]_{\text{tot}} + 1} \quad (\text{S23e})$$

From the proposed 4-step mechanism, and assuming we are always at equilibrium, then the rate determining steps (rds) are eqs (S16) and (S17). Now for the rds of eq (S17) we can write

$$-\frac{d[A]}{dt} = k_1 [A]_t + k_2 [A]_t [B]_t \quad (\text{S24})$$

and by substitution of eqs (S22d) and (S23d)

$$-\frac{d[A]}{dt} = k_1 \frac{K_{A \cdot L} [A]_{\text{tot}}}{K_{A \cdot L} + [L]_{\text{tot}}} + k_2 \frac{K_{A \cdot L} [A]_{\text{tot}}}{K_{A \cdot L} + [L]_{\text{tot}}} \frac{[B]_{\text{tot}}}{K_{B \cdot L} [L]_{\text{tot}} + 1} \quad (\text{S25a})$$

$$-\frac{d[A]}{dt} = k_1 \left[ \frac{K_{A \cdot L}}{K_{A \cdot L} + [L]_{\text{tot}}} \right] [A]_{\text{tot}} + k_2 \left[ \frac{K_{A \cdot L}}{K_{A \cdot L} + [L]_{\text{tot}}} \right] \left[ \frac{1}{K_{B \cdot L} [L]_{\text{tot}} + 1} \right] [A]_{\text{tot}} [B]_{\text{tot}} \quad (\text{S25b})$$

where it is understood “[B]<sub>tot</sub>” = [B]<sub>tot,t</sub>, that is, the rate-determining step of eq (S17) makes [B]<sub>t</sub>, that is then rapidly partitioned by the K<sub>B·L</sub> equilibrium:

$$\text{or} \quad -\frac{d[A]}{dt} = k_{1obs} [A]_{\text{tot}} + k_{2obs} [A]_{\text{tot}} [B]_{\text{tot},t} \quad (\text{S25c})$$

$$\text{where} \quad k_{1obs} = k_1 \left[ \frac{K_{A \cdot L}}{K_{A \cdot L} + [L]_{\text{tot}}} \right] \quad (\text{S25d})$$

$$k_{2obs} = k_2 \left[ \frac{K_{A \cdot L}}{K_{A \cdot L} + [L]_{\text{tot}}} \right] \left[ \frac{1}{K_{B \cdot L} [L]_{\text{tot}} + 1} \right] \quad (\text{S25e})$$

Eqs (S25d) and (S25e) can be converted to eqs (S26a) and (S26b)

$$k_{1obs} = \frac{k_1 K_{A \cdot L}}{K_{A \cdot L} + [L]_{tot}} \quad (S26a)$$

$$k_{2obs} = \frac{k_2 K_{A \cdot L}}{K_{B \cdot L} [L]_{tot}^2 + (K_{A \cdot L} K_{B \cdot L} + 1)[L]_{tot} + K_{A \cdot L}} \quad (S26b)$$

Eq (S26b) predicts that a plot of  $k_{2obs}$  vs  $[L]_{tot}$  will look similar to the one in Figure S1 and be fit by eq (S26b).

Next, as for the temperature dependence of just  $K_{A \cdot L}$  and  $K_{B \cdot L}$ , we know

$$\Delta G_{A \cdot L} = -RT \ln(K_{A \cdot L}) \quad (S27a)$$

or 
$$K_{A \cdot L} = e^{-\Delta G_{A \cdot L}/RT} \quad (S27b)$$

$$\Delta G_{B \cdot L} = -RT \ln(K_{B \cdot L}) \quad (S28a)$$

or 
$$K_{B \cdot L} = e^{-\Delta G_{B \cdot L}/RT} \quad (S28b)$$

If needed eqs (S27) and (S28) can be substituted into eq (S26) for temperature dependent studies.

As for the temperature dependence, substituting eqs (S27b) and (S28b), we obtain

$$k_{1obs} = \frac{k_1 e^{-\Delta G_{A \cdot L}/RT}}{e^{-\Delta G_{A \cdot L}/RT} + [L]_{tot}} \quad (S29a)$$

$$k_{2obs} = \frac{k_2 e^{-\Delta G_{A \cdot L}/RT}}{e^{-\Delta G_{B \cdot L}/RT} [L]_{tot}^2 + (e^{-\Delta G_{A \cdot L}/RT} e^{-\Delta G_{B \cdot L}/RT} + 1)[L]_{tot} + e^{-\Delta G_{A \cdot L}/RT}} \quad (S29b)$$

Note additionally,  $\Delta G_i = \Delta H_i - T\Delta S_i$  can then be substituted into eq (S29) as desired.

### S3. The Pseudo-Elementary-Step Reporter-Reaction Method Employed For Monitoring the Kinetics and COPASI Curve-Fitting According to the OFWK 4-Step Mechanism

As before,<sup>3</sup> we use the cyclohexene plus H<sub>2</sub> pseudoelementary-step reporter reaction method for following the nanoparticle formation kinetics. In the case of the *unimolecular nucleation*, 2-step mechanism given by eq (S30) (i.e., and consistent with the postulated mechanism steps (S16) and (S17) above), it has previously been shown<sup>3,4,5</sup> that the loss of H<sub>2</sub> (followed using a sensitive,  $\pm 0.02$  psi pressure transducer), or its equivalent cyclohexene loss by the known 1:1 H<sub>2</sub> to cyclohexene stoichiometry, obeys eq (S31). The experimental conditions of the reaction are such that the [cyclohexene]/[A] ratio is chosen to be  $\sim 1400$  (actually 1375 in all of the experiments herein) when [A] (the [(Bu<sub>4</sub>N)<sub>5</sub>Na<sub>3</sub>(1,5-COD)Ir•P<sub>2</sub>W<sub>15</sub>Nb<sub>3</sub>O<sub>62</sub>] precatalyst) is at what we denote as “standard conditions” of 1.2 mM. Note that it is a reasonably good, acceptable approximation to treat the nucleation as unimolecular for the purpose of the COPASI curve-fitting, even if it is experimentally known to be second order and nominally / apparently bimolecular, because (as detailed in an earlier publication<sup>1</sup>)  $k_{1\text{obs}} = k_{1\text{obs}(\text{bimol})}[A]_t = k_{1\text{obs}(\text{bimol})}[A]_0$  during the induction period where  $[A]_t = [A]_0$  to a high (>99%) degree of approximation.<sup>1</sup>

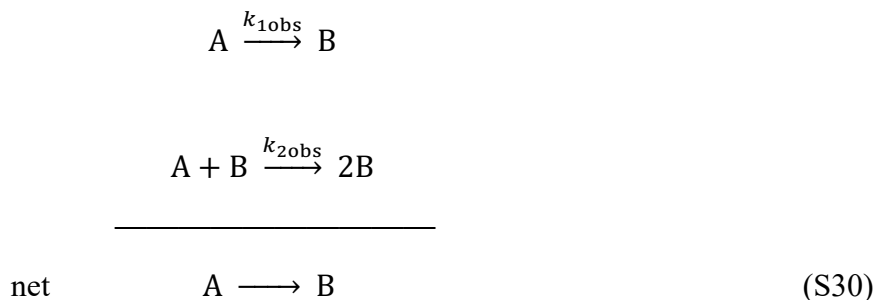

$$-\frac{d[\text{cyclohexene}]}{dt} = k_{1\text{obs}(\text{curvefit})}[\text{cyclohexene}]_t + \quad \text{(S31)}$$

$$k_{2\text{obs}(\text{curvefit})}[\text{cyclohexene}]_t * ([\text{cyclohexene}]_0 - [\text{cyclohexene}]_t)$$

where  $k_{1\text{obs}(\text{curvefit})} = k_{1\text{obs}}$ , but  $k_{2\text{obs}(\text{curvefit})} = k_{2\text{obs}} / ([\text{cyclohexene}] / [A])$ , or  $k_{2\text{obs}(\text{curvefit})} = k_{2\text{obs}} / 1400$  for 1.2 mM precatalyst solutions.



## High Resolution Transmission Electron Microscopy Data For Representative Ir(0)<sub>n</sub>(POM<sup>9-</sup>)<sub>m</sub> Nanoparticles Prepared in the Present Study

We have previously published multiple TEM images of POM-stabilized Ir(0)<sub>n</sub>(POM<sup>9-</sup>)<sub>m</sub> nanoparticles formed from (Bu<sub>4</sub>N)<sub>5</sub>Na<sub>3</sub>[(1,5-COD)Ir<sup>I</sup>•P<sub>2</sub>W<sub>15</sub>Nb<sub>3</sub>O<sub>62</sub>] in propylene carbonate at 22.0 ± 0.1 °C, with 1.65 M initial cyclohexene concentration, and with and an initial H<sub>2</sub> pressure of 40 psig.<sup>6,7,8,9,10</sup> Figure S1 displays HR-TEM images, at two different magnifications, of a representative sample harvested after 10 h and post showing that 1.0 equivalent of cyclooctane had evolved as determined by GC. Particle size measurements were collected from various HR-TEM images and used to construct the histogram given in Figure S3(C). HR-TEM images of another sample are given in Figure S2.

The average diameter of the POM-stabilized Ir(0)<sub>n</sub> nanoparticles is 1.7 ± 0.3 nm for both samples. Polyoxometalate anionic ligand can provide enough stabilization for the Ir(0)<sub>n</sub> nanoparticles so that near-monodisperse<sup>11</sup> Ir(0)<sub>n</sub>(POM<sup>9-</sup>)<sub>m</sub> nanoparticles are formed from the reduction of (Bu<sub>4</sub>N)<sub>5</sub>Na<sub>3</sub>[(1,5-COD)Ir<sup>I</sup>•P<sub>2</sub>W<sub>15</sub>Nb<sub>3</sub>O<sub>62</sub>] precursor.

The TEM images show that well-formed, almost near-monodisperse (i.e., ±15%),<sup>11</sup> 1.74±0.32 (±18%) nanoparticles are formed, nanoparticles therefore of *average* size of around Ir(0)<sub>~200</sub>.

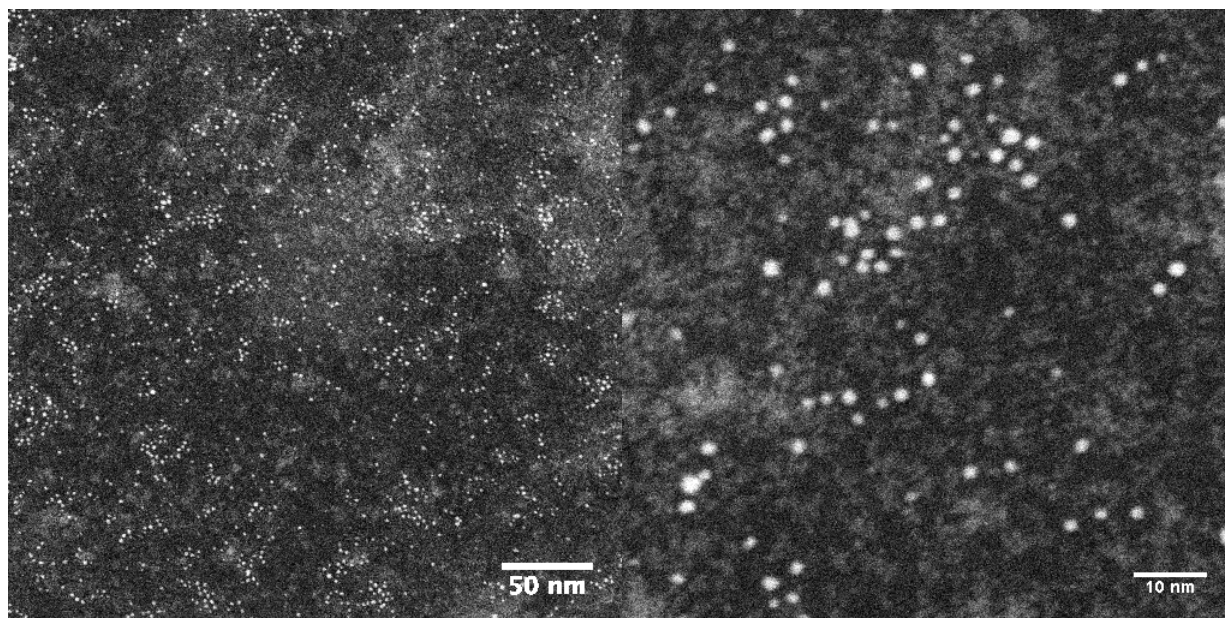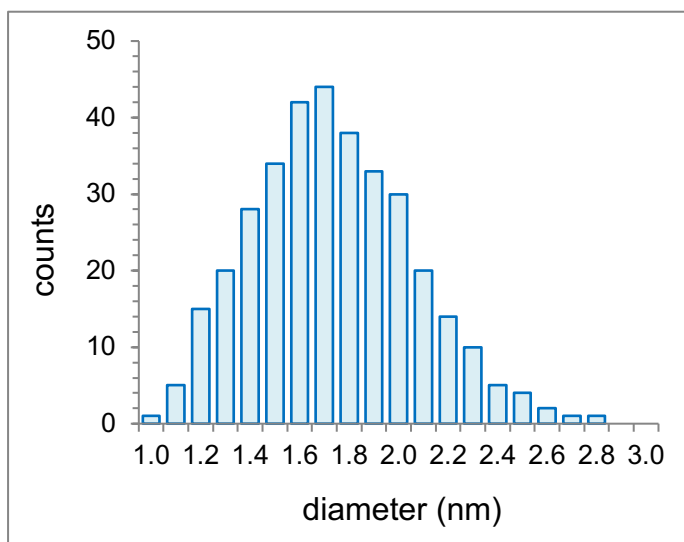

**Figure S1.** Bright field STEM images (top) and the corresponding particle size histogram (bottom) of Ir(0) nanoparticles formed during a Standard Conditions nanoparticle formation and concomitant cyclohexene hydrogenation starting with 1.2 mM [(Bu<sub>4</sub>N)<sub>5</sub>Na<sub>3</sub>(1,5-COD)Ir•P<sub>2</sub>W<sub>15</sub>Nb<sub>3</sub>O<sub>62</sub>] in propylene carbonate at 22.0 ± 0.1 °C, 1.65 M initial cyclohexene concentration, and an initial H<sub>2</sub> pressure of 40.5 psig. The resultant average diameter is 1.74 ± 0.32 nm. The histogram was constructed by counting 347 non-touching particles in multiple TEM images.

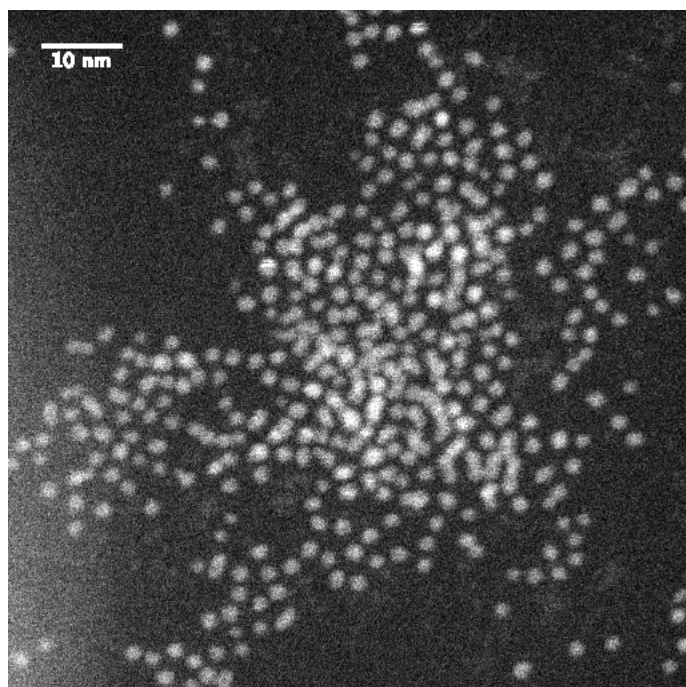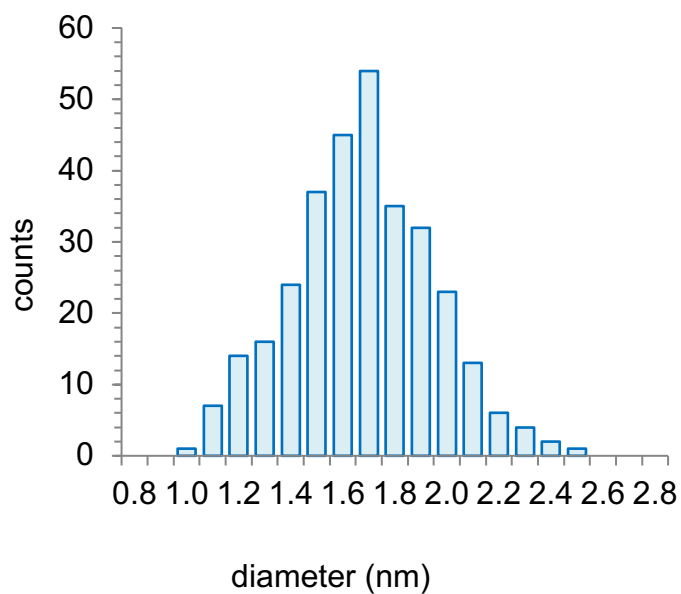

**Figure S2.** Bright field STEM images (top) and the corresponding particle size histograms (down) of a second sample of  $\text{Ir}(0)_n$  nanoparticles formed during a Standard Conditions  $\text{Ir}(0)_n$  nanoparticle formation reaction and concomitant cyclohexene hydrogenation starting with 1.2 mM  $[(\text{Bu}_4\text{N})_5\text{Na}_3(1,5\text{-COD})\text{Ir}\cdot\text{P}_2\text{W}_{15}\text{Nb}_3\text{O}_{62}]$  in propylene carbonate at  $22.0 \pm 0.1$  °C and an initial  $\text{H}_2$  pressure of 46.1 psi (31.4 psig). The average diameter from this particular reaction is  $1.68 \pm 0.2$ , and hence the same within experimental error as the sample shown in Figure S1. The histogram was constructed by counting 352 non-touching particles in various TEM images.

**Table S1.** Observed rate constant,  $k_{2\text{obs}}$ , for the autocatalytic surface growth of  $\text{Ir}(0)_n(\text{POM}^{9-})_m$  nanoparticles obtained by curve-fitting the CHRR kinetics data to the FW 2-step mechanism. The kinetics data were collected for a Standard Conditions  $\text{Ir}(0)_n$  nanoparticle formation and concomitant cyclohexene hydrogenation reporter reaction starting with  $[\text{A}]_0 = [(1,5\text{-COD})\text{Ir}\cdot\text{P}_2\text{W}_{15}\text{Nb}_3\text{O}_{62}]^{8-}]_0$  precursor plus added polyoxometalate stabilizer  $[\text{POM}^{9-}]_{\text{added}} = [\text{P}_2\text{W}_{15}\text{Nb}_3\text{O}_{62}^{9-}]_{\text{added}}$  in propylene carbonate at  $22.0 \pm 0.1$  °C, and an initial  $\text{H}_2$  pressure of  $40 \pm 1$  psig, all as described in greater detail elsewhere.<sup>1</sup>

| Experiment Number | $[\text{Ir-POM}^{8-}]$ in mM | Added $[\text{POM}^{9-}]_{\text{added}}$ in mM | Total $[\text{POM}^{9-}]$ in mM | $k_{2\text{obs}}$ in $\text{h}^{-1} \text{M}^{-1}$ |
|-------------------|------------------------------|------------------------------------------------|---------------------------------|----------------------------------------------------|
| 1                 | 0.25                         | 0                                              | 0.25                            | 1540                                               |
| 2                 | 0.25                         | 0                                              | 0.25                            | 2030                                               |
| 3                 | 0.75                         | 0                                              | 0.75                            | 1300                                               |
| 4                 | 0.75                         | 0                                              | 0.75                            | 1800                                               |
| 5                 | 0.75                         | 0                                              | 0.75                            | 1470                                               |
| 6                 | 1.5                          | 0                                              | 1.5                             | 870                                                |
| 7                 | 1.5                          | 0                                              | 1.5                             | 880                                                |
| 8                 | 1.5                          | 0                                              | 1.5                             | 1840                                               |
| 9                 | 2.61                         | 0                                              | 2.61                            | 760                                                |
| 10                | 3.73                         | 0                                              | 3.73                            | 690                                                |
| 11                | 4.84                         | 0                                              | 4.84                            | 550                                                |
| 12                | 4.84                         | 0                                              | 4.84                            | 505                                                |
| 13                | 6.04                         | 0                                              | 6.04                            | 280                                                |
| 14                | 7.25                         | 0                                              | 7.25                            | 305                                                |
| 15                | 7.25                         | 0                                              | 7.25                            | 210                                                |
| 16                | 8.45                         | 0                                              | 8.45                            | 215                                                |
| 17                | 8.45                         | 0                                              | 8.45                            | 157                                                |
| 18                | 8.45                         | 0                                              | 8.45                            | 214                                                |
| 19                | 1.20                         | 0                                              | 1.20                            | 2180                                               |
| 20                | 1.20                         | 0                                              | 1.20                            | 2344                                               |
| 21                | 1.20                         | 0                                              | 1.20                            | 2262                                               |
| 22                | 1.20                         | 0                                              | 1.20                            | 1300                                               |
| 23                | 1.20                         | 0.15                                           | 1.35                            | 1571                                               |
| 24                | 1.20                         | 0.15                                           | 1.35                            | 1245                                               |
| 25                | 1.20                         | 0.15                                           | 1.35                            | 1613                                               |
| 26                | 1.20                         | 0.15                                           | 1.35                            | 1225                                               |
| 27                | 1.20                         | 0.30                                           | 1.5                             | 2414                                               |
| 28                | 1.20                         | 0.30                                           | 1.5                             | 1575                                               |
| 29                | 1.20                         | 0.30                                           | 1.5                             | 958                                                |
| 30                | 1.20                         | 0.60                                           | 1.8                             | 1492                                               |
| 31                | 1.20                         | 0.60                                           | 1.8                             | 1566                                               |
| 32                | 1.20                         | 0.60                                           | 1.8                             | 713                                                |
| 33                | 1.20                         | 0.90                                           | 2.1                             | 1313                                               |
| 34                | 1.20                         | 0.90                                           | 2.1                             | 768                                                |
| 35                | 1.20                         | 0.90                                           | 2.1                             | 720                                                |
| 36                | 1.20                         | 1.2                                            | 2.4                             | 907                                                |
| 37                | 1.20                         | 1.5                                            | 2.7                             | 829                                                |
| 38                | 1.20                         | 1.8                                            | 3.0                             | 761                                                |
| 39                | 1.20                         | 2.1                                            | 3.3                             | 641                                                |

## Curve-Fitting of Cyclohexene Hydrogenation Reporter Reaction (CHRR) Kinetics Data Where No Added POM<sup>9-</sup> Is Present by the OFWK 4-Step Mechanism Containing the A•L Plus B•L Equilibria

It occurred to us that we should also try to fit the cyclohexene hydrogenation reporter reaction (CHRR) kinetics data back in Figure 1 as a further test of the OFWK 4-Step Mechanism with its A•L and B•L equilibria shown back in Scheme 3 in the main text. Figure S3 shows just such a fit of the experimental CHRR kinetics data using the OFWK 4-step mechanism and COPASI numerical integration software.<sup>12</sup> The fit is excellent ( $R^2 = 0.99026$ ), perhaps not unexpectedly since the OFWK 4-step mechanism has four additional fitting parameters<sup>13</sup> over the minimalistic FW 2-step mechanism.

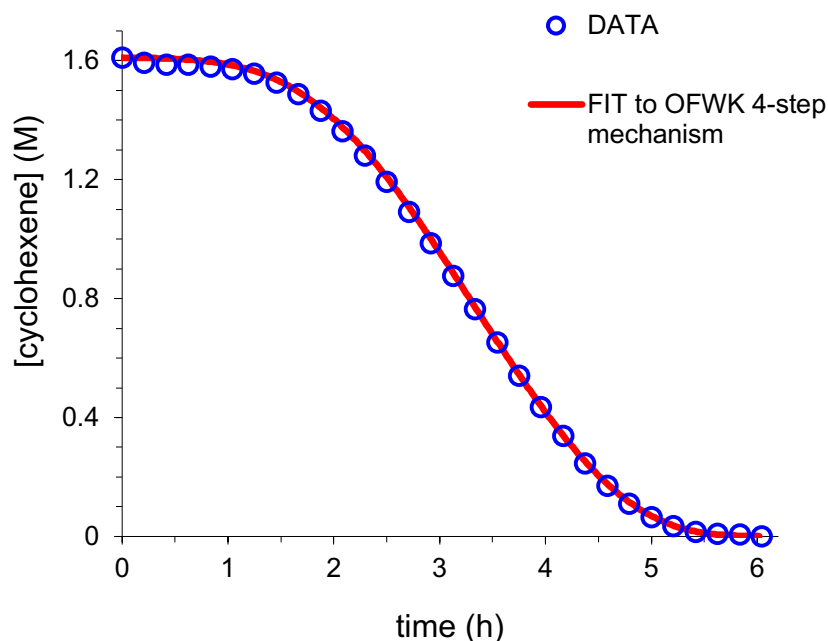

**Figure S3.** Cyclohexene concentration loss (blue circles) vs time plot for Ir(0)<sub>n</sub> nanoparticle formation and concomitant cyclohexene hydrogenation starting with the Standard Conditions of 1.2 mM [(Bu<sub>4</sub>N)<sub>5</sub>Na<sub>3</sub>(1,5-COD)Ir<sup>I</sup>•P<sub>2</sub>W<sub>15</sub>Nb<sub>3</sub>O<sub>62</sub>] precursor solution in 2.5 mL propylene carbonate, 1.65 M initial cyclohexene concentration at 22.0 ± 0.1 °C, and an initial H<sub>2</sub> pressure of 40.6 psig—but with no added POM<sup>9-</sup>. Also shown is the fit (red solid line) of the data to the OFWK 4-step mechanism in Scheme 3. The resultant, COPASI<sup>12</sup>-determined parameters via an unconstrained fitting are:  $k_{A\cdot L} = 34 \pm 17 \text{ h}^{-1}$ ,  $k_{A\cdot L}^{-1} = (2.6 \pm 1.2) \times 10^5 \text{ h}^{-1}\text{M}^{-1}$ ,  $k_1 = (8.2 \pm 2.8) \times 10^{-3} \text{ h}^{-1}$ ,  $k_2 = (7.7 \pm 0.6) \times 10^7 \text{ h}^{-1}\text{M}^{-1}$ ,  $k_{B\cdot L} = (5.7 \pm 0.1) \times 10^4 \text{ h}^{-1}$ , and  $k_{B\cdot L}^{-1} = (9.4 \pm 1.2) \times 10^{-2} \text{ h}^{-1}$ . The indicated error estimates are from the fit.

As a check on the curve fitting and equilibrium constants produced in this work, we can check the dissociation equilibrium constant for  $A \bullet L \rightleftharpoons A + L$ ,  $K_{A \bullet L} = k_{A \bullet L} / k_{A \bullet L}^- \approx 1.3 \times 10^{-6} \text{ M}^{-1}$ , against the experimental value measured by  $^{31}\text{P}$  NMR of<sup>1</sup>  $K_{\text{Diss(appeant)}} (=K_{A \bullet L} \text{ (herein)}) \approx 6.4 \times 10^{-5} \text{ M}^{-1}$ . The agreement is within a factor of  $\sim 50$ , so rough agreement only. The equilibrium constant for  $B \bullet L \rightleftharpoons B + L$ ,  $K_{B \bullet L} = k_{B \bullet L} / k_{B \bullet L}^- \approx 1.3 \times 10^5 \text{ M}^{-1}$  from the fit in Figure S3. This is a  $\sim 10^3$  order of magnitude larger than the value ( $K_{B \bullet L} = 1.4 \times 10^2 \text{ M}^{-1}$ ) obtained by fitting the  $k_{2\text{obs}}$  versus  $[\text{POM}^{9-}]_{\text{tot}}$  data to eq (3) in Figure 4 all of the main text. Hence and overall, while the A•L Plus B•L OFWK 4-step mechanism can fit the  $\text{Ir}(0)_n(\text{POM}^{9-})_m$  nanoparticle formation kinetics data with no added  $\text{POM}^{9-}$  present, it remains to (i) be further tested vs other possible mechanisms, and (ii) the ability (or not) of the OFWK 4-step mechanism to obtain reliable equilibrium and rate constants from at least cyclohexene reporter reaction kinetics data remains as another question requiring further testing.

### **Curve-Fitting of Cyclohexene Hydrogenation Reporter Reaction (CHRR) Kinetics Data With Added $\text{POM}^{9-}$ Present by the OFWK 4-Step Mechanism Containing the A•L Plus B•L Equilibria**

The addition of  $\text{POM}^{9-}$  changes the CHRR kinetics, slowing the reaction as expected and leading to a somewhat different shaped kinetics curve, as a comparison of Figures S3 (above) and S4 (below) reveals. Shown in Figure S4 is a CHRR kinetics curve with 1.8 mM added  $\text{POM}^{9-}$  along with attempted curve-fits to the FW 2-step and then OFCK 4-step mechanisms.

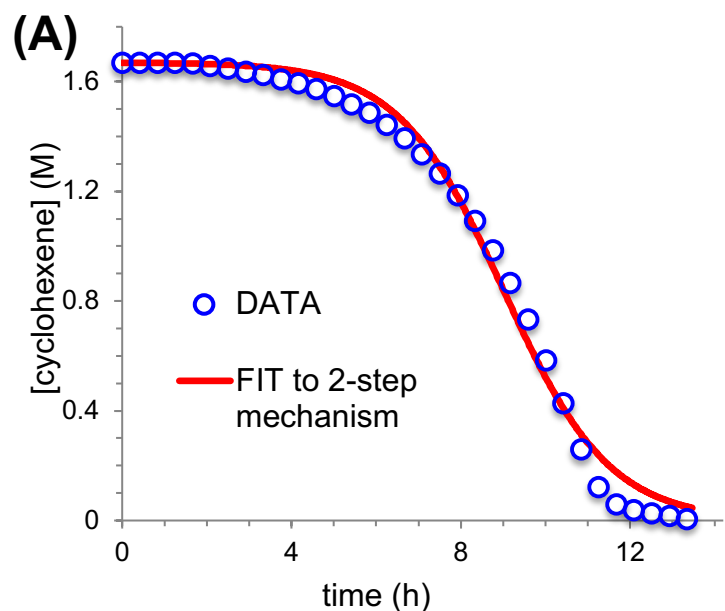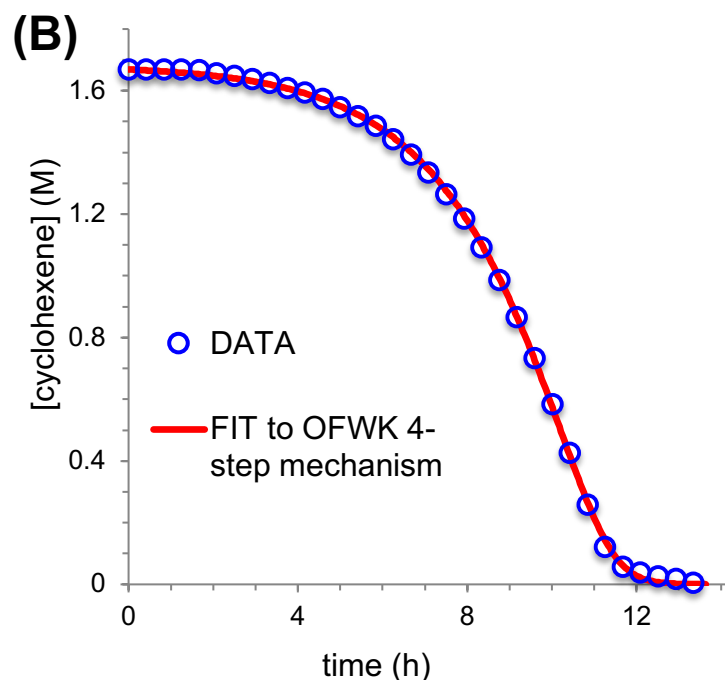

**Figure S4.** Cyclohexene concentration loss versus time plot for the Standard Conditions  $\text{Ir}(0)_n$  nanoparticle formation and concomitant cyclohexene hydrogenation starting with 1.2 mM  $[(\text{Bu}_4\text{N})_5\text{Na}_3(1,5\text{-COD})\text{Ir}^{\text{I}}\cdot\text{P}_2\text{W}_{15}\text{Nb}_3\text{O}_{62}]$  plus 1.8 mM added  $\text{POM}^{9-}$  solution and 1.65 M cyclohexene in 2.5 mL propylene carbonate at  $22.0 \pm 0.1$  °C and an initial  $\text{H}_2$  pressure of 40.7 psig. Shown is the fit of data to: (A) the FW 2-step mechanism<sup>3</sup> yielding  $k_{1\text{obs}} = (1.7 \pm 0.2) \times 10^{-4} \text{ h}^{-1}$  and  $k_{2\text{obs}} = (6.6 \pm 0.2) \times 10^2 \text{ h}^{-1}\text{M}^{-1}$ ,  $R^2 = 0.992$ ; and (B) the OFWK 4-step mechanism (Scheme 3 of the main text) yielding  $k_{\text{A}\cdot\text{L}} = 14 \pm 64 \text{ h}^{-1}$ ,  $k_{\text{A}\cdot\text{L}}^- = (1.6 \pm 6.9) \times 10^6 \text{ h}^{-1}\text{M}^{-1}$ ,  $k_1 = 1.0 \pm 0.9 \text{ h}^{-1}$ ,  $k_2 = (5.7 \pm 0.7) \times 10^8 \text{ h}^{-1}\text{M}^{-1}$ ,  $k_{\text{B}\cdot\text{L}} = (1.1 \pm 0.6) \times 10^6 \text{ h}^{-1}$ , and  $k_{\text{B}\cdot\text{L}}^- = 0.8 \pm 2.2 \text{ h}^{-1}$ ,  $R^2 = 0.991$ .

Of these two mechanisms, the OFWK 4-step mechanism clearly does the best job of accounting for the CHRR kinetics data when added POM<sup>9-</sup> ligand and nanoparticle stabilizer is present, although once again the OFWK mechanism has two additional fitting parameters. However, the resulting fit parameter for the OFWK 4-step mechanism are ill-defined as the **bolded error bars** above indicate. If one goes ahead anyway and looks at the  $K_{A\cdot L}$  and  $K_{B\cdot L}$  for the OFWK 4-step mechanism and the curve-fit in Figure S4 Part (B), then  $K_{A\cdot L} = k_{A\cdot L}/k_{A\cdot L}^- \approx 8.8 \times 10^{-6} \text{ M}^{-1}$  (compared to the <sup>31</sup>P NMR obtained value of  $K_{\text{Diss(appeant)}} (=K_{A\cdot L} \text{ (herein)}) \approx 6.4 \times 10^{-5} \text{ M}^{-1}$ ) and  $K_{B\cdot L} = k_{B\cdot L}/k_{B\cdot L}^- \approx 1.4 \times 10^6 \text{ M}^{-1}$  (compared to  $K_{B\cdot L} = 1.4 \times 10^2 \text{ M}^{-1}$  obtained by fitting the  $k_{2\text{obs}}$  versus  $[\text{POM}^{9-}]_{\text{tot}}$  data in Figure 4 to eq (3) in the main text. Hence the “agreement” is  $\pm 7$ -fold for  $K_{A\cdot L}$  to  $\pm 10^4$  for  $K_{B\cdot L}$ . Clearly, more work with additional data sets, and especially by monitoring methods complimentary to and other than the CHRR method, as well as mechanism-enabled population-balance modeling (ME-PBM)<sup>14</sup> will be needed to identify the best, while still minimum, therefore Ockham’s razor obeying, mechanisms when ligands are present.

### Curve-Fitting of the Cyclohexene Hydrogenation Reporter Reaction (CHRR) Kinetics Data Without, Then With, Added POM<sup>9-</sup> Present by a New, 3-Step Mechanism Uncovered via Recent Mechanism-Enabled Population Balance Modeling Efforts<sup>14</sup>

In recent studies mechanism-enabled population balance studies, the new 3-step mechanism shown in Scheme S1 was uncovered and found to be allow a superior fit to Ir(0)<sub>n</sub> particle-size distributions to at least the mechanisms tested therein.<sup>14</sup> Hence, it was of interest to try to fit the CHRR without, and then with, added POM<sup>9-</sup> to this 3 step mechanism. That attempted fits are shown in Figure S5 and S6.

**Scheme S1.** The new 3-step mechanism for the nanoparticle formation.<sup>14</sup> A is the nanoparticle precursor, B represents the average smaller, growing nanoparticles, and C represents the average larger, growing nanoparticles.

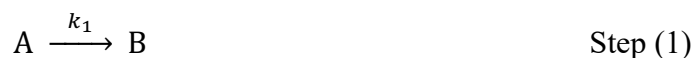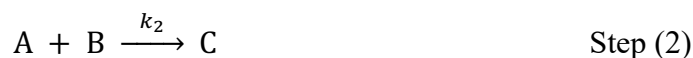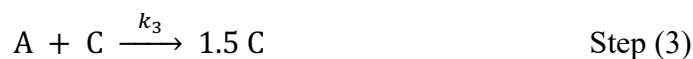



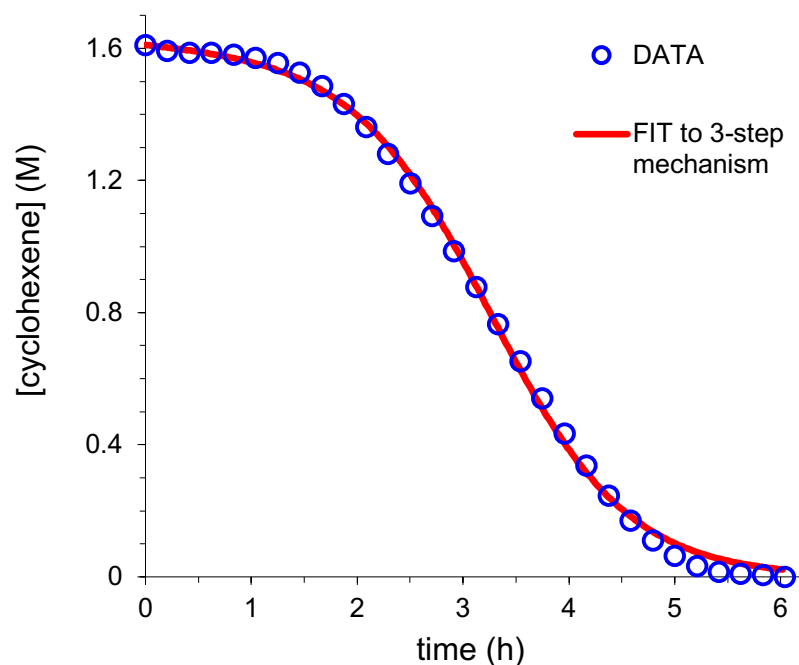

**Figure S5.** Cyclohexene concentration loss versus time plot for a Standard Conditions Ir(0)<sub>n</sub> nanoparticle formation and concomitant cyclohexene hydrogenation starting with 1.2 mM [(Bu<sub>4</sub>N)<sub>5</sub>Na<sub>3</sub>(1,5-COD)Ir•P<sub>2</sub>W<sub>15</sub>Nb<sub>3</sub>O<sub>62</sub>] solution in propylene carbonate, with 1.65 M initial cyclohexene concentration, at 22.0 ± 0.1 °C, an initial H<sub>2</sub> pressure of 40.6 psig, *but no additional added POM<sup>9</sup>*. The fit of the data to the new 3-step mechanism<sup>14</sup> shown above in Scheme 1 yields  $k_1 = (2.2 \pm 0.2) \times 10^{-2} \text{ h}^{-1}$ ,  $k_2 = (3.7 \pm 0.2) \times 10^2 \text{ h}^{-1} \text{ M}^{-1}$  and  $k_3 = (2.7 \pm 0.2) \times 10^3 \text{ h}^{-1} \text{ M}^{-1}$ ,  $R^2 = 0.982$ .

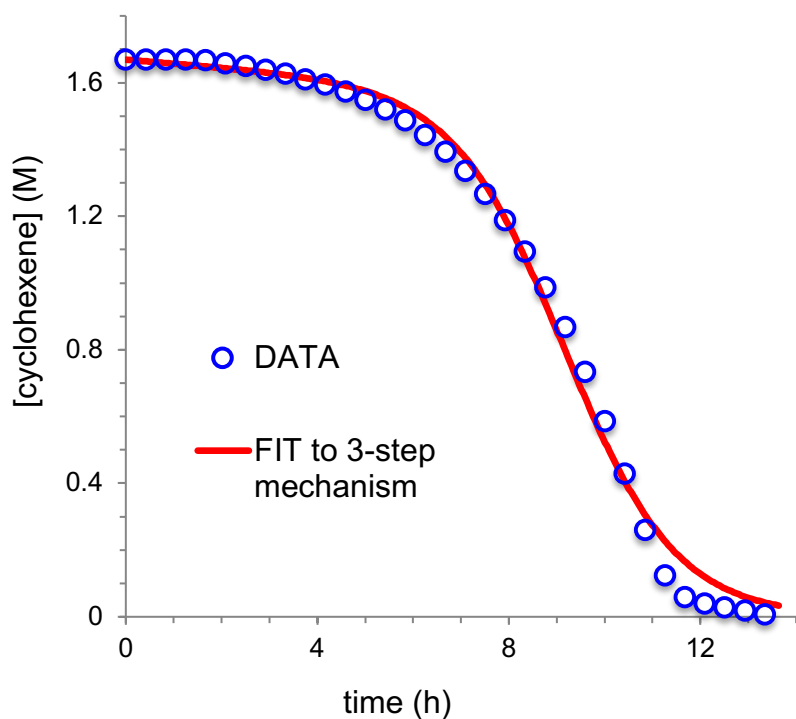

**Figure S6.** Cyclohexene concentration loss versus time plot for the Standard Conditions Ir(0)<sub>n</sub> nanoparticle formation and concomitant cyclohexene hydrogenation starting with 1.2 mM [(Bu<sub>4</sub>N)<sub>5</sub>Na<sub>3</sub>(1,5-COD)Ir<sup>I</sup>•P<sub>2</sub>W<sub>15</sub>Nb<sub>3</sub>O<sub>62</sub>] plus 1.8 mM added POM<sup>9-</sup> and 1.65 M cyclohexene in propylene carbonate at 22.0 ± 0.1 °C and an initial H<sub>2</sub> pressure of 40.7 psig. Shown is the fit of data to the new 3-step mechanism<sup>14</sup> to yield  $k_1 = (7.2 \pm 0.6) \times 10^{-3} \text{ h}^{-1}$ ,  $k_2 = 14 \pm 4 \text{ h}^{-1}\text{M}^{-1}$  and  $k_3 = (1.5 \pm 0.6) \times 10^3 \text{ h}^{-1}\text{M}^{-1}$ ,  $R^2 = 0.955$ .

The fits in Figures S5 and S6 teach that while the fit is acceptable when no added POM<sup>9-</sup> ligand is present, Figure S5, as soon as 1.8 mM POM<sup>9-</sup> ligand has been added, the 3-step mechanism provides a less good accounting of the CHRR kinetics data. Additionally, the result of  $k_2 > k_3$  does not match (is actually the opposite of) what is found from the mechanism-enabled population-balance modeling (ME-PBM)<sup>14</sup> of the particle-size distributions, at least when no added POM<sup>9-</sup> ligand is present. Our hypotheses at this point are supported by the results elsewhere,<sup>14</sup> namely (i) that the CHRR by itself is unable to unequivocally distinguish the various mechanisms, so (ii) that only when the ME-PBM is used to analyze the PSDs will the underlying minimal mechanism of a given particle formation reaction be more secure.<sup>14</sup>

## References

- <sup>1</sup> Özkar, S.; Finke, R. G. Nanoparticle Nucleation Is Termolecular in Metal and Involves Hydrogen: Evidence for a Kinetically Effective Nucleus of Three  $\{\text{Ir}_3\text{H}_{2x}\cdot\text{P}_2\text{W}_{15}\text{Nb}_3\text{O}_{62}\}^{6-}$  in  $\text{Ir}(0)_n$  Nanoparticle Formation From  $[(1,5\text{-COD})\text{Ir}^{\text{I}}\cdot\text{P}_2\text{W}_{15}\text{Nb}_3\text{O}_{62}]^{8-}$  Plus Dihydrogen, *J. Am. Chem. Soc.* **2017**, *139*, 5444-5457, and references therein.
- <sup>2</sup> Mondloch, J. E.; Finke, R. G. Kinetic Evidence for Bimolecular Nucleation in Supported-Transition-Metal-Nanoparticle Catalyst Formation in Contact with Solution: The Prototype  $\text{Ir}(1,5\text{-COD})\text{Cl}/\gamma\text{-Al}_2\text{O}_3$  to  $\text{Ir}(0)_{\sim 900}/\gamma\text{-Al}_2\text{O}_3$  System *ACS Catalysis* **2012**, *2*, 298–305.
- <sup>3</sup> Watzky, M. A.; Finke, R. G. Transition Metal Nanocluster Formation Kinetic and Mechanistic Studies. A New Mechanism When Hydrogen is the Reductant: Slow, Continuous Nucleation and Fast Autocatalytic Surface Growth, *J. Am. Chem. Soc.*, **1997**, *119*, 10382-10400. Watzky, M. A.; Finke, R. G. *J. Am. Chem. Soc.* **1997**, *119*, 10382–10400.
- <sup>4</sup> Lin, Y.; Finke, R. G. A More General Approach to Distinguishing ‘Homogeneous’ from ‘Heterogeneous’ Catalysis: Discovery of Polyoxoanion and  $\text{Bu}_4\text{N}^+$ -Stabilized, Isolable and Redissolvable, High Reactivity  $\text{Ir}_{\sim 190-450}$  Nanocluster Catalysts”, *Inorg. Chem.* **1994**, *33*, 4891-4910.
- <sup>5</sup> Watzky, M. A.; Finke, R. G. Nanocluster Size-Control and “Magic Number” Investigations. Experimental Tests of the “Living-Metal Polymer” Concept and of Mechanism-Based Size-Control Predictions Leading to the Syntheses of Iridium(0) Nanoclusters Centering About Four Sequential Magic Numbers, *Chem. Mater.* **1997**, *9*, 3083–3095.
- <sup>6</sup> Lin, Y.; Finke, R. G. Novel Polyoxoanion- and  $\text{Bu}_4\text{N}^+$ -Stabilized, Isolable, and Redissolvable, 20-30-Å.  $\text{Ir}_{300-900}$  Nanoclusters: The Kinetically Controlled Synthesis, Characterization, and Mechanism of Formation of Organic Solvent-Soluble, Reproducible Size, and Reproducible Catalytic Activity Metal Nanoclusters. *J. Am. Chem. Soc.* **1994**, *116*, 8335–8353.
- <sup>7</sup> Özkar, S.; Finke, R. G. Nanoparticle Nucleation Is Termolecular in Metal and Involves Hydrogen: Evidence for a Kinetically Effective Nucleus of Three  $\{\text{Ir}_3\text{H}_{2x}\cdot\text{P}_2\text{W}_{15}\text{Nb}_3\text{O}_{62}\}^{6-}$  in  $\text{Ir}(0)_n$  Nanoparticle Formation From  $[(1,5\text{-COD})\text{Ir}^{\text{I}}\cdot\text{P}_2\text{W}_{15}\text{Nb}_3\text{O}_{62}]^{8-}$  Plus Dihydrogen, *J. Am. Chem. Soc.* **2017**, *139*, 5444-5457, and references therein.
- <sup>8</sup> Özkar, S.; Finke, R. Dust Effects On Nucleation Kinetics and Nanoparticle Product Size-Distributions: The Illustrative Case Study of a Prototype  $\text{Ir}(0)_n$  Transition-Metal Nanoparticle Formation System, *Langmuir*, **2017**, *33*, 6550-6562. See also the references in this paper to the history and prior key literature on the effects of dust on particle formation and nucleation kinetics.
- <sup>9</sup> Özkar, S.; Finke, R. G. Nanocluster Formation and Stabilization Fundamental Studies, Part II: Proton Sponge<sup>TM</sup> as an Effective  $\text{H}^+$  Scavenger and Expansion of the Anion Stabilization Ability Series. *Langmuir* **2002**, *18*, 7653-7662.
- <sup>10</sup> Özkar, S.; Finke, R. G. Transition-Metal Nanocluster Stabilization Fundamental Studies: Hydrogen Phosphate as a Simple, Effective, Readily Available, Robust, and Previously Unappreciated Stabilizer for Well-Formed, Isolable, and Redissolvable  $\text{Ir}(0)$  and Other Transition-Metal Nanoclusters, *Langmuir*, **2003**, *19*, 6247-6260.
- <sup>11</sup> Aiken, J.D.; Finke, R.G. A Perspective on Nanocluster Catalysis: Polyoxoanion and  $(n\text{-C}_4\text{H}_9)_4\text{N}^+$  Stabilized  $\text{Ir}(0)_{\sim 300}$  Nanocluster ‘Soluble Heterogeneous Catalysts’ *J. Mol. Catal. A* **1996**, *114*, 29-51.

- 
- <sup>12</sup> Hoops, S.; Sahle, S.; Gauges, R.; Lee, C.; Pahle, J.; Simus, N.; Singhal, M.; Xu, L.; Mendes, P.; Kummer, U. COPASI—a COMplex PATHway Simulator. *Bioinformatics* 2006, 22, 3067-3074.
- <sup>13</sup> Kent, P. D.; Mondloch, J. E.; Finke, R. G. A Four-Step Mechanism for the Formation of Supported-Nanoparticle Heterogeneous Catalysts in Contact with Solution: The Conversion of Ir(1,5-COD)Cl/ $\gamma$ -Al<sub>2</sub>O<sub>3</sub> to Ir(0)<sub>~170</sub>/ $\gamma$ -Al<sub>2</sub>O<sub>3</sub>, *J. Am. Chem. Soc.* **2014**, 136, 1930-1941.
- <sup>14</sup> Handwerk, D.; Shipman, P. D.; Whitehead C. B., Özkar, S. Finke, R. G. Mechanism-Enabled Population Balance Modeling En Route to Particle Size and Size-Distributions, **2019**, submitted.
